# Supplementary material for: Phonophoresis through Nonsteroidal Anti-Inflammatory Drugs for Knee Osteoarthritis Treatment: Systematic Review and Meta-Analysis
Source: MDPI journal article supplement (doi:10.3390/biomedicines10123254), 2022-12-14
Supplement: s1 [file s1]

Supplementary Table S1. Search strategy.

| WEB OF SCIENCE                                       | Results |
|------------------------------------------------------|---------|
| <i>Phonophoresis AND Drugs</i>                       | 123     |
| <i>Phonophoresis AND Ions</i>                        | 3       |
| <i>Phonophoresis AND Inflammation</i>                | 22      |
| <i>Phonophoresis AND Pharmaceutical preparations</i> | 4       |
| TOTAL                                                | 152     |

| SCOPUS                                               | Results |
|------------------------------------------------------|---------|
| <i>Phonophoresis AND Drugs</i>                       | 107     |
| <i>Phonophoresis AND Ions</i>                        | 1       |
| <i>Phonophoresis AND Inflammation</i>                | 20      |
| <i>Phonophoresis AND Pharmaceutical preparations</i> | 3       |
| TOTAL                                                | 131     |

| PUBMED                                               | Results |
|------------------------------------------------------|---------|
| <i>Phonophoresis AND Drugs</i>                       | 43      |
| <i>Phonophoresis AND Ions</i>                        | 3       |
| <i>Phonophoresis AND Inflammation</i>                | 14      |
| <i>Phonophoresis AND Pharmaceutical preparations</i> | 30      |
| TOTAL                                                | 90      |

| CINAHL Complete                                      | Results |
|------------------------------------------------------|---------|
| <i>Phonophoresis AND Drugs</i>                       | 26      |
| <i>Phonophoresis AND Ions</i>                        | 1       |
| <i>Phonophoresis AND Inflammation</i>                | 5       |
| <i>Phonophoresis AND Pharmaceutical preparations</i> | 0       |
| TOTAL                                                | 32      |

| SciELO                                               | Results |
|------------------------------------------------------|---------|
| <i>Phonophoresis AND Drugs</i>                       | 2       |
| <i>Phonophoresis AND Ions</i>                        | 0       |
| <i>Phonophoresis AND Inflammation</i>                | 3       |
| <i>Phonophoresis AND Pharmaceutical preparations</i> | 0       |
| TOTAL                                                | 5       |

| PEDro                                                | Results |
|------------------------------------------------------|---------|
| <i>Phonophoresis AND Drugs</i>                       | 0       |
| <i>Phonophoresis AND Ions</i>                        | 0       |
| <i>Phonophoresis AND Inflammation</i>                | 1       |
| <i>Phonophoresis AND Pharmaceutical preparations</i> | 0       |
| TOTAL                                                | 1       |
